# Supplementary material for: Targeting DSS-induced ulcerative colitis: evaluating the therapeutic potential of WPI–stachyose conjugates
Source: Royal Society of Chemistry journal article supplement (doi:10.1039/d3fo03598k), 2023-11-17
Supplement: d3fo03598k1.pdf [file d3fo03598k1.pdf]

## Supplementary data

**Table S1**

Disease activity index (DAI) scoring criteria for DSS-induced colitis mice.

| Score | Weight loss (%) | Diarrhea      | Hematochezia |
|-------|-----------------|---------------|--------------|
| 0     | <1              | None          | -            |
| 1     | 1-5             | Loose stool   | +            |
| 2     | 5-10            | Diarrhea      | ++           |
| 3     | 10-15           | Mild diarrhea | +++          |
| 4     | >15             | Liquid stool  | ++++         |

**Table S2**

Histological injury score for the assessment of tissue damage.

| Symptom                   | Description                             | Score |
|---------------------------|-----------------------------------------|-------|
| Epithelial cells          | Normal                                  | 0     |
|                           | Goblet cells disappear                  | 1     |
|                           | Large area of goblet cell disappears    | 2     |
|                           | Crypt disappearance                     | 3     |
|                           | Large area of crypt disappearance       | 4     |
| Inflammatory infiltration | Normal                                  | 0     |
|                           | Infiltration to the base of the crypt   | 1     |
|                           | Infiltration into the mucosa            | 2     |
|                           | Extensive mucosal infiltration          | 3     |
|                           | Mucosal infiltration to the lower layer | 4     |

**Table S3**

Analysis of alpha diversity

| Groups  | Species richness             | Species diversity         |                           |
|---------|------------------------------|---------------------------|---------------------------|
|         | Chao1                        | Shannon                   | Simpson                   |
| NC      | 557.33 ± 103.84 <sup>a</sup> | 6.12 ± 0.56 <sup>a</sup>  | 0.95 ± 0.01 <sup>a</sup>  |
| DSS     | 332.05 ± 29.26 <sup>b</sup>  | 5.02 ± 0.16 <sup>b</sup>  | 0.79 ± 0.02 <sup>b</sup>  |
| PM-DSS  | 336.59 ± 84.46 <sup>b</sup>  | 5.27 ± 0.36 <sup>ab</sup> | 0.92 ± 0.02 <sup>ab</sup> |
| W-S-DSS | 492.66 ± 94.15 <sup>a</sup>  | 5.90 ± 0.61 <sup>ab</sup> | 0.94 ± 0.02 <sup>a</sup>  |

PM, physical mixture of whey protein isolate and stachyose; W-S, whey protein isolates glycosylated with stachyose.

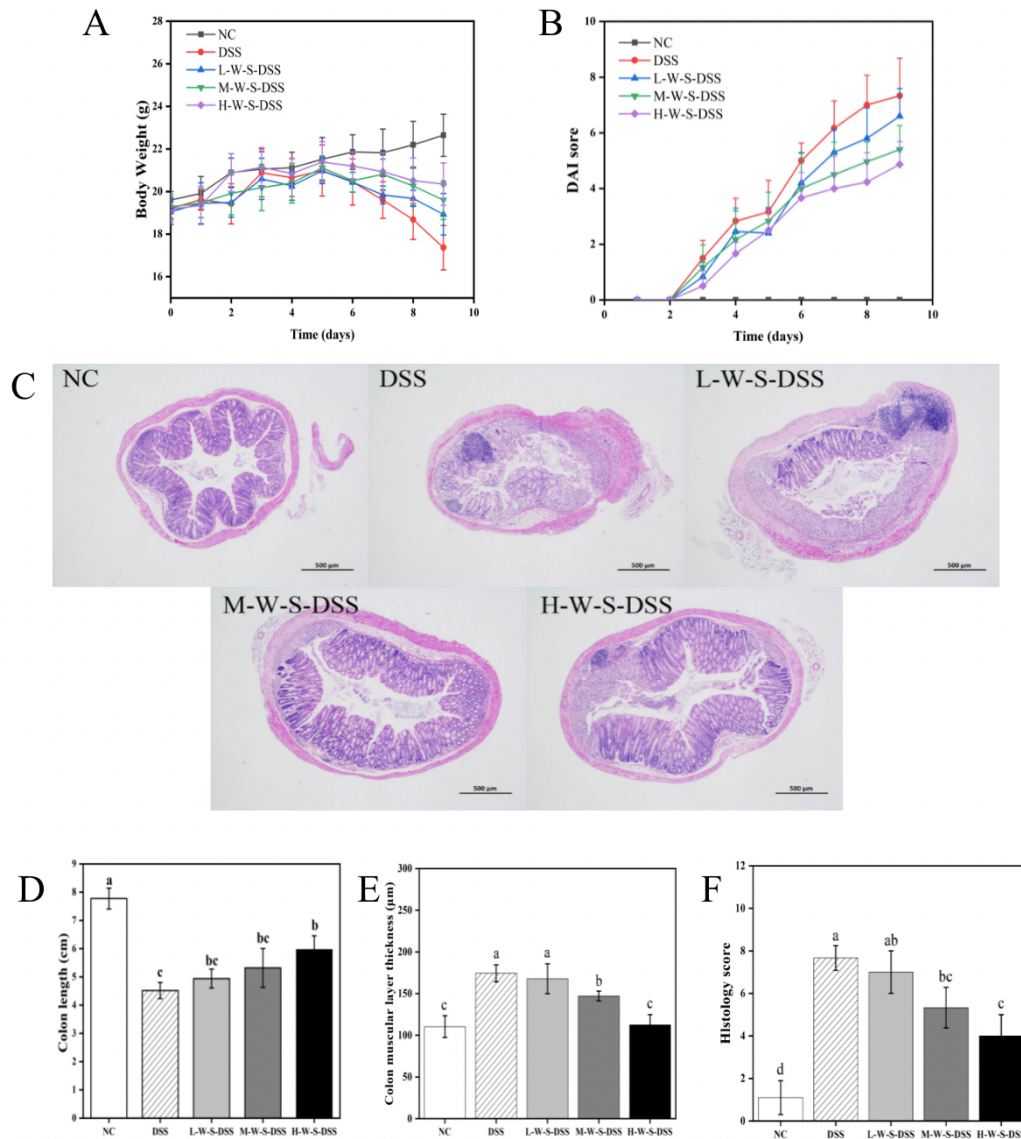

**Fig S1**

Fig S1. Assessment of pre-experimental parameters: (A) Body weight changes throughout the experimental period. (B) Disease activity index (DAI) scores illustrating the severity of the disease. (C) Representative hematoxylin and eosin-stained colon images from each mice group (40× magnification). (D) Comparison of colon lengths among different mice groups. (E) Measurements of colon muscular layer thickness. (F) Histopathology scores for each experimental group. Abbreviations: NC - normal control; DSS - induced colitis; L/M/H-W-S-DSS low (250 mg/kg) /medium (500 mg/kg) /high (1000 mg/kg) oral dosage of WPI-Stachyose treatment post-DSS induction.
